# Supplementary material for: In Vitro Antioxidant Activities of Plant Polyphenol Extracts and Their Combined Effect with Flaxseed on Raw and Cooked Breast Muscle Fatty Acid Content, Lipid Health Indices and Oxidative Stability in Slow-Growing Sasso Chickens
Source: MDPI journal article supplement (doi:10.3390/foods12010115), 2022-12-26
Supplement: s1 [file s1]

Table S1. Ingredients, nutrient levels and fatty acid composition of diets for Sasso T451A chickens

| Ingredients (g/kg)             | Diets <sup>1</sup> |         |         |         |         |         | Flaxseed |
|--------------------------------|--------------------|---------|---------|---------|---------|---------|----------|
|                                | NC                 | FS      | VE8     | DA8     | TS8     | CD8     |          |
| Maize                          | 468                | 405     | 405     | 405     | 405     | 405     |          |
| Soybean meal                   | 60                 | 55      | 55      | 55      | 55      | 55      |          |
| Flaxseed                       | 0                  | 75      | 75      | 75      | 75      | 75      |          |
| Wheat                          | 148                | 140     | 140     | 140     | 140     | 140     |          |
| Sunflower                      | 30                 | 5       | 5       | 5       | 5       | 5       |          |
| Wheat bran                     | 140                | 190     | 190     | 190     | 190     | 190     |          |
| Soybean full fat               | 35                 | 10      | 10      | 10      | 10      | 10      |          |
| Meat and Bone                  | 12                 | 10      | 10      | 10      | 10      | 10      |          |
| Niger seed cake                | 34                 | 37      | 37      | 37      | 37      | 37      |          |
| Salt                           | 1                  | 1       | 1       | 1       | 1       | 1       |          |
| Limestone                      | 60                 | 60      | 60      | 60      | 60      | 60      |          |
| Premix general*                | 10                 | 10      | 10      | 10      | 10      | 10      |          |
| L-Lysine HCL                   | 1                  | 1       | 1       | 1       | 1       | 1       |          |
| DL-Methionine                  | 1                  | 1       | 1       | 1       | 1       | 1       |          |
| Vitamin E (mg/kg)              | 0                  | 0       | 800     | 0       | 0       | 0       |          |
| <i>D. angustifolia</i> (mg/kg) | 0                  | 0       | 0       | 800     | 0       | 0       |          |
| <i>T. schimperi</i> (mg/kg)    | 0                  | 0       | 0       | 0       | 800     | 0       |          |
| <i>C. domestica</i> (m/kg)     | 0                  | 0       | 0       | 0       | 0       | 800     |          |
| Calculated composition         |                    |         |         |         |         |         |          |
| Dry matter (%)                 | 91.89              | 91.66   | 92.13   | 91.43   | 91.41   | 91.72   |          |
| ME (Kcal)                      | 2999.62            | 2989.81 | 2997.12 | 2992.37 | 2989.91 | 2983.27 |          |
| Either Extract (%)             | 5.53               | 5.54    | 5.55    | 5.57    | 5.52    | 5.52    |          |
| Crude protein (%)              | 15.53              | 15.68   | 15.48   | 15.47   | 15.68   | 15.65   |          |
| Crude fibre (%)                | 5.52               | 5.44    | 5.27    | 5.46    | 5.56    | 5.47    |          |
| Calcium (%)                    | 3.11               | 3.13    | 3.08    | 3.04    | 3.03    | 3.06    |          |
| Fatty acid composition (%)     |                    |         |         |         |         |         |          |
| C14:0                          | 0.17               | 0.14    | 0.12    | 0.12    | 0.13    | 0.14    | 0.06     |
| C16:0                          | 14.58              | 13.03   | 12.91   | 14.28   | 13.21   | 12.92   | 7.09     |
| C18:0                          | 3.43               | 4.29    | 4.19    | 3.48    | 3.91    | 4.27    | 4.63     |
| C18:1 <sub>cis</sub> -9        | 22.60              | 20.96   | 22.19   | 21.55   | 21.30   | 20.69   | 16.45    |
| C18:2 <sub>n</sub> -6          | 53.31              | 39.65   | 41.52   | 45.80   | 43.75   | 38.51   | 15.46    |
| C18:3 <sub>n</sub> -3          | 2.87               | 18.03   | 16.92   | 11.90   | 15.53   | 20.14   | 54.24    |
| <sup>2</sup> SFA               | 19.58              | 18.82   | 18.74   | 19.38   | 18.75   | 18.68   | 12.48    |
| <sup>3</sup> MUFA              | 24.27              | 22.55   | 23.61   | 23.13   | 22.78   | 22.20   | 17.44    |
| <sup>4</sup> PUFA              | 56.15              | 58.63   | 57.65   | 57.49   | 58.47   | 59.12   | 70.08    |
| <i>n</i> -3 PUFA               | 2.87               | 18.03   | 16.92   | 11.90   | 15.53   | 20.14   | 54.33    |
| <i>n</i> -6 PUFA               | 53.35              | 39.69   | 41.55   | 45.85   | 43.79   | 38.55   | 15.76    |

| n-6/n-3 ratio | 19.08 | 2.10 | 2.58 | 3.94 | 2.98 | 1.87 | 0.29 |
|---------------|-------|------|------|------|------|------|------|
|---------------|-------|------|------|------|------|------|------|

<sup>1</sup>NC: 0 g flaxseed + no antioxidant sources, FS: 75 g flaxseed + no antioxidant sources, VE8: 75 g flaxseed + 800 mg  $\alpha$ -tocopherol /kg, DA8: 75 g flaxseed + 800 mg *D. angustifolia* extract /kg, TS8: 75 g flaxseed + 800 mg *T. schimperii* /kg, CD8: 75 g flaxseed + 800 mg *C. domestica* /kg diet, <sup>2</sup>Saturated fatty acids;

<sup>3</sup>Monounsaturated fatty acids; <sup>4</sup>polyunsaturated fatty acids.

\*Mineral-vitamin mixtures provided per kg of feed: retinyl acetate (Vit A), 1.2 mg; cholecalciferol (Vit D) 0.00015 mg; all-rac-alpha-tocopherol acetate (E) 10 mg, menadione vitamin K3 0.8 mg; vitamin B1 0.6 mg; vitamin B2 (riboflavin) 2 mg; vitamin B3 (calcium-D-pantothenate) 3.6 mg; vitamin B6 2 mg; vitamin B12 (Cyanocobalamin) 0.01 mg; vitamin PP (Nicotinic acid) 12 mg; folic acid 0.4 mg; biotin 0.04 mg; Choline 259.5 mg; iron 18 mg; copper 6 mg; manganese 30 mg; zinc oxide 28 mg; iodine 0.8 mg; selenium 0.16 mg; calcium 492.6 mg, magnesium 5.07 mg; sodium 0.38, chloride 741.25 mg (Intraco Ltd. Jordaenskaai 24 2000 Antwerpen, Belgium).

Table S2. Effect of supplementing plant polyphenol extracts and flaxseed on fat content and fatty acid concentration (mg/100g) in raw breast muscle of Sasso chickens

| Fatty acids<br>(mg /100g) | Treatments         |                |                    |                |                    |                |                    |                |                     |                |                   |                | Rando<br>m<br>effect | p-value |
|---------------------------|--------------------|----------------|--------------------|----------------|--------------------|----------------|--------------------|----------------|---------------------|----------------|-------------------|----------------|----------------------|---------|
|                           | NC                 |                | FS                 |                | VE8                |                | DA <sub>s</sub>    |                | TS <sub>s</sub>     |                | CD <sub>s</sub>   |                |                      |         |
|                           | Mean               | 95% [LCL, UCL] | Mean                | 95% [LCL, UCL] | Mean              | 95% [LCL, UCL] |                      |         |
| C10:0                     | 0.75               | [0.64, 0.84]   | 0.74               | [0.64, 0.84]   | 0.76               | [0.66, 0.86]   | 0.78               | [0.68, 0.88]   | 0.74                | [0.64, 0.84]   | 0.83              | [0.73, 0.93]   | 0                    | 0.7761  |
| C12:0                     | 0.84               | [0.73, 0.95]   | 0.85               | [0.74, 0.96]   | 0.95               | [0.84, 1.05]   | 0.89               | [0.79, 1.01]   | 0.78                | [0.66, 0.88]   | 0.98              | [0.86, 1.08]   | non 0                | 0.1220  |
| C14:0                     | 7.41               | [5.87, 8.94]   | 7.43               | [5.90, 8.97]   | 8.37               | [6.84, 9.90]   | 8.17               | [6.64, 9.71]   | 6.37                | [4.84, 7.90]   | 8.29              | [6.76, 9.82]   | 0                    | 0.3971  |
| C15:0                     | 1.42               | [1.18, 1.66]   | 1.42               | [1.18, 1.66]   | 1.34               | [1.10, 1.58]   | 1.48               | [1.24, 1.72]   | 1.24                | [0.99, 1.48]   | 1.43              | [1.19, 1.67]   | 0                    | 0.7541  |
| C16:0                     | 297                | [253, 342]     | 288                | [244, 333]     | 319                | [275, 364]     | 315                | [270, 359]     | 262                 | [217, 306]     | 322               | [277, 366]     | 0                    | 0.3610  |
| C17:0                     | 2.29               | [1.92, 2.67]   | 2.34               | [1.97, 2.71]   | 2.34               | [1.9, 2.72]    | 2.42               | [2.05, 2.80]   | 2.01                | [1.64, 2.38]   | 2.44              | [2.07, 2.81]   | 0                    | 0.6024  |
| C18:0                     | 114                | [102.2, 126]   | 112                | [99.7, 124]    | 119                | [107.3, 131]   | 120                | [108.3, 132]   | 101                 | [88.7, 113]    | 120               | [107.9, 132]   | 0                    | 0.1634  |
| C20:0                     | 0.98               | [0.82, 1.13]   | 0.99               | [0.84, 1.15]   | 0.96               | [0.80, 1.12]   | 1.13               | [0.97, 1.29]   | 0.81                | [0.66, 0.97]   | 1.04              | [0.88, 1.19]   | 0                    | 0.1199  |
| C21:0                     | 0.28               | [0.25, 0.31]   | 0.33               | [0.29, 0.36]   | 0.31               | [0.27, 0.33]   | 0.30               | [0.27, 0.34]   | 0.29                | [0.25, 0.32]   | 0.30              | [0.27, 0.33]   | 0                    | 0.4388  |
| C22:0                     | 1.46               | [1.32, 1.60]   | 1.40               | [1.26, 1.54]   | 1.29               | [1.16, 1.43]   | 1.44               | [1.30, 1.58]   | 1.35                | [1.21, 1.48]   | 1.46              | [1.32, 1.60]   | non 0                | 0.4390  |
| C23:0                     | 1.44               | [1.21, 1.67]   | 1.57               | [1.34, 1.80]   | 1.48               | [1.25, 1.71]   | 1.63               | [1.40, 1.86]   | 1.62                | [1.39, 1.85]   | 1.68              | [1.46, 1.91]   | non 0                | 0.6294  |
| C24:0                     | 0.79               | [0.64, 0.93]   | 0.82               | [0.68, 0.96]   | 0.67               | [0.53, 0.81]   | 0.83               | [0.68, 0.97]   | 0.76                | [0.61, 0.90]   | 0.76              | [0.61, 0.90]   | non-0                | 0.6595  |
| ΣSFA                      | 430                | [372, 489]     | 420                | [361, 478]     | 458                | [399, 517]     | 455                | [397, 514]     | 381                 | [323, 440]     | 462               | [403, 521]     | 0                    | 0.3362  |
| C14:1cis-9                | 0.45               | [0.29, 0.60]   | 0.41               | [0.25, 0.56]   | 0.57               | [0.42, 0.73]   | 0.51               | [0.35, 0.66]   | 0.41                | [0.25, 0.56]   | 0.57              | [0.41, 0.72]   | 0                    | 0.4426  |
| C16:1cis-9                | 20.8               | [15.2, 26.5]   | 19.5               | [13.9, 25.2]   | 26.1               | [20.4, 31.7]   | 22.8               | [17.2, 28.5]   | 19.0                | [13.3, 24.6]   | 25.6              | [20.0, 31.3]   | 0                    | 0.3114  |
| C17:1cis-9                | 6.03               | [5.43, 6.64]   | 5.70               | [5.09, 6.30]   | 5.72               | [5.12, 6.32]   | 5.50               | [4.90, 6.11]   | 6.49                | [5.89, 7.09]   | 6.99              | [6.39, 7.59]   | 0                    | 0.0056  |
| C18:1trans-9              | 0.77               | [0.50, 1.03]   | 0.61               | [0.34, 0.87]   | 0.75               | [0.48, 1.01]   | 0.71               | [0.44, 0.97]   | 0.61                | [0.34, 0.87]   | 0.78              | [0.51, 1.04]   | non 0                | 0.8715  |
| C18:1trans-11             | 0.08               | [-0.03, 0.20]  | 0.24               | [0.12, 0.35]   | 0.18               | [0.05, 0.29]   | 0.16               | [0.04, 0.27]   | 0.14                | [0.02, 0.26]   | 0.07              | [-0.04, 0.18]  | 0                    | 0.3571  |
| C18:1cis-9                | 326                | [262, 390]     | 322                | [258, 386]     | 358                | [294, 422]     | 357                | [293, 421]     | 287                 | [223, 351]     | 363               | [299, 427]     | 0                    | 0.4900  |
| C18:1cis-11               | 28.2               | [24.3, 32.1]   | 26.5               | [22.6, 30.4]   | 28.9               | [25.1, 32.8]   | 27.8               | [23.9, 31.7]   | 25.6                | [21.7, 29.5]   | 28.8              | [24.9, 32.7]   | 0                    | 0.7839  |
| C20:1cis-11               | 2.77               | [2.19, 3.34]   | 2.83               | [2.25, 3.40]   | 2.78               | [2.21, 3.36]   | 3.15               | [2.58, 3.73]   | 2.33                | [1.75, 2.90]   | 2.95              | [2.37, 3.52]   | 0                    | 0.4630  |
| C22:1cis-13               | 0.57               | [0.43, 0.70]   | 0.56               | [0.42, 0.69]   | 0.52               | [0.38, 0.65]   | 0.60               | [0.46, 0.73]   | 0.41                | [0.27, 0.54]   | 0.58              | [0.44, 0.71]   | 0                    | 0.3690  |
| ΣMUFA                     | 386                | [311, 460]     | 378                | [304, 452]     | 424                | [349, 498]     | 418                | [344, 493]     | 342                 | [268, 416]     | 430               | [356, 504]     | 0                    | 0.5033  |
| C18:2n-6                  | 279                | [232, 327]     | 271                | [224, 319]     | 266                | [218, 313]     | 291                | [244, 339]     | 231                 | [184, 279]     | 282               | [234, 329]     | 0                    | 0.5525  |
| C18:3n-6                  | 1.44 <sup>ab</sup> | [1.11, 1.76]   | 1.55 <sup>a</sup>  | [1.23, 1.87]   | 1.71 <sup>a</sup>  | [1.39, 2.03]   | 1.66 <sup>b</sup>  | [1.34, 1.97]   | 1.02 <sup>b</sup>   | [0.69, 1.34]   | 1.65 <sup>a</sup> | [1.33, 1.97]   | 0                    | 0.0267  |
| C18:3n-3                  | 16.9 <sup>a</sup>  | [11.1, 22.6]   | 20.8 <sup>ab</sup> | [15.1, 26.6]   | 26.6 <sup>bc</sup> | [20.9, 32.4]   | 27.9 <sup>bc</sup> | [22.2, 33.7]   | 22.7 <sup>abc</sup> | [16.9, 28.4]   | 30.5 <sup>c</sup> | [24.8, 36.3]   | 0                    | 0.0189  |
| C18:2cis-9,<br>trans 11   | 0.40               | [0.32, 0.48]   | 0.39               | [0.31, 0.46]   | 0.42               | [0.34, 0.49]   | 0.49               | [0.41, 0.57]   | 0.41                | [0.33, 0.49]   | 0.45              | [0.37, 0.53]   | 0                    | 0.4301  |
| C18:4n-3                  | 0.24 <sup>a</sup>  | [0.17, 0.30]   | 0.31 <sup>ab</sup> | [0.24, 0.38]   | 0.40 <sup>b</sup>  | [0.33, 0.47]   | 0.37 <sup>ab</sup> | [0.30, 0.44]   | 0.25 <sup>a</sup>   | [0.18, 0.32]   | 0.44 <sup>c</sup> | [0.36, 0.50]   | 0                    | 0.0001  |
| C20:2n-6                  | 2.99               | [2.66, 3.32]   | 2.85               | [2.52, 3.18]   | 2.54               | [2.21, 2.87]   | 2.87               | [2.54, 3.20]   | 2.59                | [2.26, 2.92]   | 2.87              | [2.54, 3.20]   | non 0                | 0.3196  |

|            |                    |               |                    |               |                    |                |                     |               |                     |              |                    |               |       |         |
|------------|--------------------|---------------|--------------------|---------------|--------------------|----------------|---------------------|---------------|---------------------|--------------|--------------------|---------------|-------|---------|
| C20:3n-9   | 0.72               | [0.62, 0.82]  | 0.68               | [0.57, 0.78]  | 0.72               | [0.62, 0.82]   | 0.78                | [0.68, 0.88]  | 0.70                | [0.59, 0.80] | 0.75               | [0.64, 0.85]  | 0     | 0.7569  |
| C20:3n-6   | 5.49               | [4.95, 6.04]  | 5.21               | [4.67, 5.75]  | 5.34               | [4.80, 5.88]   | 5.67                | [5.12, 6.21]  | 5.39                | [4.85, 5.93] | 5.76               | [5.22, 6.31]  | non 0 | 0.6931  |
| C20:3n-3   | 0.35 <sup>a</sup>  | [0.24, 0.45]  | 0.46 <sup>ac</sup> | [0.35, 0.56]  | 0.57 <sup>b</sup>  | [0.46, 0.67]   | 0.68 <sup>b</sup>   | [0.57, 0.78]  | 0.59 <sup>bc</sup>  | [0.48, 0.70] | 0.67 <sup>b</sup>  | [0.56, 0.77]  | non 0 | <0.0001 |
| C20:4n-6   | 84.20              | [78.1, 90.4]  | 83.2               | [77.0, 89.4]  | 86.5               | [80.3, 92.7]   | 82.5                | [76.3, 88.7]  | 79.9                | [73.7, 86.0] | 86.6               | [80.4, 92.7]  | non 0 | 0.6225  |
| C20:5n-3   | 0.31 <sup>a</sup>  | [0.003, 0.62] | 0.66 <sup>a</sup>  | [0.35, 0.97]  | 1.36 <sup>b</sup>  | [1.05, 1.67]   | 1.17 <sup>b</sup>   | [0.86, 1.47]  | 1.15 <sup>b</sup>   | [0.84, 1.46] | 1.49 <sup>b</sup>  | [1.17, 1.79]  | non 0 | <0.0001 |
| C22:4n-6   | 13.86 <sup>a</sup> | [12.31, 15.4] | 9.92 <sup>b</sup>  | [8.38, 11.5]  | 8.90 <sup>b</sup>  | [7.36, 10.4]   | 9.52 <sup>b</sup>   | [7.98, 11.1]  | 9.42 <sup>b</sup>   | [7.88, 11.0] | 9.17 <sup>b</sup>  | [7.62, 10.7]  | non 0 | 0.0004  |
| C22:5n-6   | 10.76 <sup>a</sup> | [9.07, 12.45] | 7.31 <sup>b</sup>  | [5.62, 8.99]  | 5.73 <sup>b</sup>  | [4.04, 7.42]   | 5.62 <sup>b</sup>   | [3.93, 7.31]  | 5.40 <sup>b</sup>   | [3.71, 7.09] | 5.58 <sup>b</sup>  | [3.89, 7.27]  | non 0 | 0.0003  |
| C22:5n-3   | 8.26 <sup>a</sup>  | [7.36, 9.15]  | 9.26 <sup>ac</sup> | [8.37, 10.15] | 11.40 <sup>b</sup> | [10.51, 12.29] | 10.42 <sup>bc</sup> | [9.52, 11.31] | 10.59 <sup>b</sup>  | [9.70, 1.49] | 10.99 <sup>b</sup> | [10.1, 11.88] | 0     | <0.0001 |
| C22:6n-3   | 23.8 <sup>a</sup>  | [21.1, 26.6]  | 34.7 <sup>b</sup>  | [31.9, 37.5]  | 39.6 <sup>c</sup>  | [36.8, 42.3]   | 34.6 <sup>bd</sup>  | [31.8, 37.4]  | 36.9 <sup>bcd</sup> | [34.1, 39.7] | 43.3 <sup>c</sup>  | [40.5, 46.0]  | non 0 | <0.0001 |
| ∑ PUFA     | 449                | [395, 504]    | 448                | [394, 503]    | 458                | [403, 512]     | 475                 | [421, 530]    | 408                 | [354, 463]   | 482                | [427, 536]    | 0     | 0.4594  |
| ∑ n-3 PUFA | 49.9 <sup>a</sup>  | [43.3, 56.6]  | 66.2 <sup>b</sup>  | [59.6, 72.9]  | 79.9 <sup>bc</sup> | [73.3, 86.6]   | 75.2 <sup>bc</sup>  | [68.5, 81.8]  | 72.2 <sup>bc</sup>  | [65.5, 78.8] | 87.3 <sup>c</sup>  | [80.7, 94.0]  | non 0 | <0.0001 |
| ∑ n-6 PUFA | 398                | [348, 449]    | 381                | [331, 432]    | 376                | [326, 427]     | 399                 | [348, 450]    | 335                 | [285, 386]   | 393                | [343, 444]    | 0     | 0.4642  |
| Fat (%)    | 1.27               | [1.09, 1.46]  | 1.25               | [1.06, 1.44]  | 1.34               | [1.15, 1.52]   | 1.35                | [1.16, 1.53]  | 1.12                | [0.93, 1.31] | 1.37               | [1.18, 1.55]  | 0     | 0.4040  |

Estimated marginal means (emmeans) with 95% upper confidence (UCL) and lower confidence limits (LCL); Emmeans within a row with different superscript letters are significantly different at  $p \leq 0.05$ ). Treatments: NC: 0 g flaxseed + no antioxidant sources, FS: 75 g flaxseed + no antioxidant sources, VE8: 75 g flaxseed + 800 mg  $\alpha$ -tocopherol /kg, DA8: 75 g flaxseed + 800 mg *D. angustifolia* extract /kg, TS8: 75 g flaxseed + 800 mg *T. schimperi* /kg, CD8: 75 g flaxseed + 800 mg *C. domestica* /kg diet, SFA: Saturated fatty acids (C10:0 + C12:0 + C14:0 + C15:0 + C16:0 + C17:0 + C18:0 + C20:0 + C21:0 + C22:0 + C23:0 + C24:0 + C26:0); MUFA: Monounsaturated fatty acids (C14:1cis-9 + C16:1cis-9 + C17:1cis-9 + C18:1trans-9 + C18:1trans-11 + C18:1cis-9 + C18:1cis-11 + C20:1cis-11 + C22:1cis-13); PUFA: Polyunsaturated fatty acids (C18:2n-6 + C18:3n-6 + C18:3n-3 + C18:2cis-9,trans-11 + C18:4n-3 + C20:2n-6 + C20:3n-9 + C20:3n-6 + C20:3n-3 + C20:4n-6 + C20:5n-3 + C22:4n-6 + C22:5n-6 + C22:5n-3 + C22:6n-3), . ∑ n-3 PUFA: Sum n-3 PUFA (C18:3n-3 + C18:4n-3 + C20:3n-3 + C20:5n-3 + C22:5n-3 + C22:6n-3); ∑ n-6 PUFA : Sum of n-3 PUFA (C18:2n-6 + C18:3n-6 + C20:2n-6 + C20:3n-6 + C20:4n-6 + C22:4n-6 + C22:5n-6).

Table S3. Effect of supplementing plant polyphenol extracts and flaxseed on fat content and fatty acid concentration (mg/100g) in cooked breast muscle of Sasso chickens

| Fatty acids (mg /100g) | Treatments         |                |                     |                |                    |                |                     |                |                   |                |                     |                | Random effect | p-value |
|------------------------|--------------------|----------------|---------------------|----------------|--------------------|----------------|---------------------|----------------|-------------------|----------------|---------------------|----------------|---------------|---------|
|                        | NC                 |                | FS                  |                | VE8                |                | DA8                 |                | TS8               |                | CD8                 |                |               |         |
|                        | Mean               | 95% [LCL, UCL] | Mean                | 95% [LCL, UCL] | Mean               | 95% [LCL, UCL] | Mean                | 95% [LCL, UCL] | Mean              | 95% [LCL, UCL] | Mean                | 95% [LCL, UCL] |               |         |
| C10:0                  | 0.63               | [0.40, 0.84]   | 0.89                | [0.67, 1.11]   | 0.79               | [0.56, 1.00]   | 0.99                | [0.77, 1.21]   | 0.82              | [0.59, 1.04]   | 0.89                | [0.67, 1.11]   | non 0         | 0.2714  |
| C12:0                  | 1.21               | [0.92, 1.50]   | 1.15                | [0.86, 1.43]   | 1.26               | [0.97, 1.55]   | 1.47                | [1.18, 1.76]   | 0.90              | [0.61, 1.19]   | 1.23                | [0.94, 1.52]   | non 0         | 0.1572  |
| C14:0                  | 12.15 <sup>a</sup> | [7.68,16.6]    | 11.16 <sup>ab</sup> | [6.69, 15.6]   | 12.71 <sup>a</sup> | [8.24, 17.2]   | 15.99 <sup>ab</sup> | [11.52, 20.5]  | 7.98 <sup>b</sup> | [3.51, 12.4]   | 11.53 <sup>ab</sup> | [7.06, 16.0]   | non 0         | 0.2562  |
| C15:0                  | 2.23               | [1.49, 2.96]   | 2.16                | [1.43, 2.90]   | 2.27               | [1.53, 3.00]   | 2.87                | [2.13, 3.60]   | 1.59              | [0.85, 2.32]   | 2.10                | [1.37, 2.84]   | non 0         | 0.2960  |
| C16:0                  | 456                | [298, 613]     | 430                 | [273, 587]     | 478                | [321, 635]     | 599                 | [441, 756]     | 322               | [165, 479]     | 453                 | [296, 610]     | non 0         | 0.2803  |
| C17:0                  | 3.62               | [2.38, 4.85]   | 3.52                | [2.29, 4.76]   | 3.91               | [2.68, 5.15]   | 4.75                | [3.52, 5.98]   | 2.62              | [1.38, 3.85]   | 3.41                | [2.17, 4.64]   | non 0         | 0.2849  |
| C18:0                  | 152                | [115.3, 189]   | 145                 | [108.4,182]    | 163                | [125.9, 200]   | 187                 | [149.8, 224]   | 125               | [87.6, 162]    | 151                 | [114.3, 188]   | non 0         | 0.3012  |
| C20:0                  | 1.74               | [1.18, 2.29]   | 1.69                | [1.13, 2.24]   | 1.82               | [1.27, 2.37]   | 2.32                | [1.76, 2.87]   | 1.42              | [0.86, 1.97]   | 1.75                | [1.20, 2.30]   | non 0         | 0.3406  |
| C21:0                  | 0.33               | [0.24, 0.41]   | 0.35                | [0.26, 0.43]   | 0.34               | [0.25, 0.42]   | 0.43                | [0.34, 0.52]   | 0.34              | [0.26, 0.43]   | 0.38                | [0.29, 0.47]   | 0             | 0.4838  |
| C22:0                  | 1.11               | [0.94, 1.27]   | 1.12                | [0.95, 1.28]   | 1.27               | [1.10, 1.43]   | 1.34                | [1.17, 1.50]   | 1.08              | [0.91, 1.24]   | 1.24                | [1.07, 1.40]   | 0             | 0.1431  |
| C23:0                  | 0.74               | [0.34, 1.14]   | 0.69                | [0.29, 1.09]   | 0.72               | [0.31, 1.12]   | 1.02                | [0.62, 1.42]   | 0.75              | [0.35, 1.15]   | 0.88                | [0.48, 1.28]   | non 0         | 0.8385  |
| C24:0                  | 1.36               | [1.20, 1.51]   | 1.27                | [1.12, 1.43]   | 1.38               | [1.22, 1.53]   | 1.42                | [1.27, 1.57]   | 1.25              | [1.10, 1.40]   | 1.38                | [1.23, 1.53]   | 0             | 0.5396  |
| ΣSFA                   | 636                | [434, 838]     | 602                 | [400, 804]     | 671                | [469, 873]     | 820                 | [618, 1022]    | 467               | [266, 669]     | 632                 | [430, 834]     | non 0         | 0.2844  |
| C14:1cis-9             | 1.10               | [0.40, 1.80]   | 1.06                | [0.36, 1.75]   | 1.00               | [0.30, 1.70]   | 1.74                | [1.04, 2.43]   | 0.58              | [-0.11, 1.28]  | 1.15                | [0.45, 1.85]   | non 0         | 0.3424  |
| C16:1cis-9             | 46.5               | [17.93, 75.1]  | 43.2                | [14.65, 71.8]  | 44.6               | [15.9, 73.2]   | 74.1                | [45.56, 102.7] | 26.5              | [-2.13, 55.0]  | 50.0                | [21.37, 78.5]  | non 0         | 0.3312  |
| C17:1cis-9             | 7.51               | [6.54, 8.47]   | 7.46                | [6.49, 8.42]   | 7.86               | [6.90, 8.83]   | 8.38                | [7.42, 9.34]   | 7.55              | [6.59, 8.52]   | 9.15                | [8.19, 10.12]  | 0             | 0.0891  |
| C18:1trans-9           | 1.73               | [1.35, 2.09]   | 1.45                | [1.08, 1.82]   | 1.72               | [1.34, 2.09]   | 1.54                | [1.16, 1.90]   | 1.13              | [0.75, 1.49]   | 1.50                | [1.13, 1.87]   | non 0         | 0.2276  |
| C18:1trans-11          | 0.46               | [-0.203, 1.13] | 0.65 <sup>a</sup>   | [-0.015, 1.32] | 0.37 <sup>ab</sup> | [-0.29, 1.048] | 1.27                | [0.60, 1.93]   | 0.28              | [-0.38, 0.95]  | 0.26                | [-0.40, 0.93]  | 0             | 0.2649  |
| C18:1cis-9             | 609                | [345, 873]     | 568                 | [304, 832]     | 649                | [385, 912]     | 861                 | [597, 1125]    | 393               | [129, 657]     | 614                 | [350, 878]     | non 0         | 0.2714  |
| C18:1cis-11            | 39.4               | [27.6, 51.3]   | 36.3                | [24.4, 48.2]   | 40.3               | [28.4, 52.2]   | 49.4                | [37.5, 61.3]   | 28.3              | [16.4, 40.1]   | 39.9                | [28.0, 51.8]   | non 0         | 0.2622  |
| C20:1cis-11            | 4.93               | [2.96, 6.90]   | 4.45                | [2.48, 6.42]   | 5.27               | [3.29, 7.24]   | 6.89                | [4.92, 8.86]   | 3.36              | [1.39, 5.34]   | 4.62                | [2.65, 6.59]   | non 0         | 0.2390  |
| C22:1cis-13            | 1.28               | [0.84, 1.71]   | 1.16                | [0.72, 1.59]   | 1.19               | [0.76, 1.63]   | 1.70                | [1.26, 2.13]   | 0.82              | [0.39, 1.26]   | 1.22                | [0.78, 1.65]   | non 0         | 0.1523  |
| ΣMUFA                  | 712                | [405, 1019]    | 664                 | [356, 971]     | 751                | [444, 1058]    | 1006                | [699, 1313]    | 462               | [154, 769]     | 722                 | [415, 1029]    | non 0         | 0.2732  |
| C18:2n-6               | 434                | [267, 601]     | 407                 | [240,574]      | 448                | [281,615]      | 576                 | [409,742]      | 283               | [116,450]      | 411                 | [244,578]      | non 0         | 0.2889  |
| C18:3n-6               | 2.60               | [1.25, 3.95]   | 2.71                | [1.35, 4.05]   | 3.03               | [1.68, 4.38]   | 3.89                | [2.53, 5.24]   | 1.82              | [0.46, 3.17]   | 2.49                | [1.14, 3.84]   | non 0         | 0.4028  |
| C18:3n-3               | 31.2               | [10.3, 52.0]   | 41.8                | [21.0, 62.7]   | 51.2               | [30.3, 72.1]   | 67.3                | [46.4, 88.1]   | 33.5              | [12.7, 54.4]   | 52.5                | [31.6, 73.4]   | 0             | 0.1353  |
| C18:2cis-9,            | 0.61               | [0.39, 0.79]   | 0.61                | [0.41, 0.81]   | 0.56               | [0.36, 0.76]   | 0.74                | [0.54, 0.93]   | 0.47              | [0.26, 0.66]   | 0.65                | [0.44, 0.84]   | 0             | 0.5204  |

|            |                    |                |                    |               |                     |               |                    |               |                    |               |                    |               |       |         |
|------------|--------------------|----------------|--------------------|---------------|---------------------|---------------|--------------------|---------------|--------------------|---------------|--------------------|---------------|-------|---------|
| tran-11    |                    |                |                    |               |                     |               |                    |               |                    |               |                    |               |       |         |
| C18:4n-3   | 0.47 <sup>a</sup>  | [0.15, 0.79]   | 0.61               | [0.28, 0.93]  | 0.75                | [0.42, 1.06]  | 0.98               | [0.66, 1.31]  | 0.54               | [0.21, 0.85]  | 0.76               | [0.44, 1.09]  | 0     | 0.2393  |
| C20:2n-6   | 3.64               | [3.01, 4.27]   | 3.28               | [2.65, 3.91]  | 3.46                | [2.83, 4.09]  | 3.87               | [3.24, 4.50]  | 2.84               | [2.21, 3.47]  | 3.35               | [2.72, 3.98]  | non 0 | 0.2987  |
| C20:3n-9   | 0.70               | [0.60, 0.79]   | 0.71               | [0.62, 0.81]  | 0.73                | [0.63, 0.82]  | 0.83               | [0.73, 0.92]  | 0.70               | [0.60, 0.79]  | 0.80               | [0.70, 0.89]  | 0     | 0.2399  |
| C20:3n-6   | 5.41               | [4.73, 6.09]   | 5.81               | [5.13, 6.49]  | 5.95                | [5.27, 6.63]  | 6.33               | [5.65, 7.01]  | 5.16               | [4.48, 5.84]  | 5.78               | [5.10, 6.46]  | 0     | 0.1934  |
| C20:3n-3   | 0.44               | [0.30, 0.57]   | 0.64               | [0.49, 0.77]  | 0.71                | [0.57, 0.85]  | 0.81               | [0.67, 0.95]  | 0.67               | [0.53, 0.81]  | 0.75               | [0.60, 0.88]  | 0     | 0.006*  |
| C20:4n-6   | 89.8               | [83.5, 96.1]   | 84.6               | [78.3, 90.8]  | 91.2                | [84.9, 97.5]  | 89.6               | [83.4, 95.9]  | 88.3               | [82.0, 94.6]  | 93.3               | [87.0, 99.6]  | 0     | 0.4745  |
| C20:5n-3   | 1.11 <sup>a</sup>  | [0.79, 1.42]   | 1.79 <sup>b</sup>  | [1.47, 2.10]  | 2.43 <sup>c</sup>   | [2.12, 2.74]  | 2.36 <sup>c</sup>  | [2.04, 2.67]  | 2.18 <sup>bc</sup> | [1.86, 2.49]  | 2.30 <sup>c</sup>  | [1.99, 2.61]  | 0     | <0.0001 |
| C22:4n-6   | 11.57 <sup>a</sup> | [10.38, 12.75] | 8.93 <sup>b</sup>  | [7.74, 10.11] | 8.29 <sup>b</sup>   | [7.11, 9.47]  | 9.27 <sup>b</sup>  | [8.08, 10.45] | 7.98 <sup>b</sup>  | [6.80, 9.17]  | 8.06 <sup>b</sup>  | [6.87, 9.24]  | 0     | <0.0001 |
| C22:5n-6   | 9.96 <sup>a</sup>  | [8.53, 11.38]  | 5.20 <sup>b</sup>  | [3.78, 6.62]  | 5.53 <sup>b</sup>   | [4.11, 6.95]  | 6.31 <sup>b</sup>  | [4.89, 7.73]  | 4.43 <sup>b</sup>  | [3.01, 5.85]  | 5.22 <sup>b</sup>  | [3.80, 6.64]  | 0     | <0.0001 |
| C22:5n-3   | 5.73               | [3.77, 7.69]   | 7.78               | [5.82, 9.74]  | 7.74                | [5.77, 9.70]  | 9.94               | [7.98, 11.90] | 8.79               | [6.83, 10.75] | 8.32               | [6.36, 10.28] | 0     | 0.0758  |
| C22:6n-3   | 27.0 <sup>a</sup>  | [22.9, 31.1]   | 33.4 <sup>b</sup>  | [29.3, 37.5]  | 40.8 <sup>c</sup>   | [36.7, 44.9]  | 37.4 <sup>bc</sup> | [33.3, 41.5]  | 39.8 <sup>c</sup>  | [35.7, 43.9]  | 45.5 <sup>c</sup>  | [41.4, 49.6]  | non 0 | <0.0001 |
| ∑ PUFA     | 624                | [434, 814]     | 605                | [415, 794]    | 670                 | [481, 860]    | 815                | [626, 1005]   | 481                | [291, 670]    | 641                | [451, 831]    | non 0 | 0.2709  |
| ∑ n-3 PUFA | 65.9 <sup>a</sup>  | [44.0, 87.8]   | 86.0 <sup>ab</sup> | [64.1, 107.9] | 103.7 <sup>bc</sup> | [81.8, 125.6] | 118.8 <sup>c</sup> | [96.9, 140.7] | 85.5 <sup>ab</sup> | [63.6, 107.4] | 110.1 <sup>b</sup> | [88.2, 132.0] | 0     | 0.0103  |
| ∑ n-6 PUFA | 557                | [385, 728]     | 517                | [346, 689]    | 565                 | [394, 737]    | 695                | [523, 867]    | 394                | [222, 566]    | 529                | [358, 701]    | 0     | 0.2845  |
| Fat (%)    | 1.97               | [1.27, 2.67]   | 1.87               | [1.17, 2.57]  | 2.09                | [1.39, 2.79]  | 2.64               | [1.94, 3.34]  | 1.41               | [0.71, 2.11]  | 2.00               | [1.29, 2.69]  | non 0 | 0.2719  |

Estimated marginal means (emmeans) with 95% upper confidence (UCL) and lower confidence limits (LCL); Emmeans within a row with different superscript letters are significantly different at  $p \leq 0.05$ ). Treatments: NC: 0 g flaxseed + no antioxidant sources, FS: 75 g flaxseed + no antioxidant sources, VE8: 75 g flaxseed + 800 mg  $\alpha$ -tocopherol /kg, DA8: 75 g flaxseed + 800 mg *D. angustifolia* extract /kg, TS8: 75 g flaxseed + 800 mg *T. schimperi* /kg, CD8: 75 g flaxseed + 800 mg *C. domestica* /kg diet, SFA: Saturated fatty acids (C10:0 + C12:0 + C14:0 + C15:0 + C16:0 + C17:0 + C18:0 + C20:0 + C21:0 + C22:0 + C23:0 + C24:0 + C26:0); MUFA: Monounsaturated fatty acids (C14:1cis-9 + C16:1cis-9 + C17:1cis-9 + C18:1trans-9 + C18:1trans-11 + C18:1cis-9 + C18:1cis-11 + C20:1cis-11 + C22:1cis-13); PUFA: Polyunsaturated fatty acids (C18:2n-6 + C18:3n-6 + C18:3n-3 + C18:2cis-9,trans-11 + C18:4n-3 + C20:2n-6 + C20:3n-9 + C20:3n-6 + C20:3n-3 + C20:4n-6 + C20:5n-3 + C22:4n-6 + C22:5n-6 + C22:5n-3 + C22:6n-3), . ∑ n-3 PUFA: Sum n-3 PUFA (C18:3n-3 + C18:4n-3 + C20:3n-3 + C20:5n-3 + C22:5n-3 + C22:6n-3); ∑ n-6 PUFA : Sum of n-6 PUFA (C18:2n-6 + C18:3n-6 + C20:2n-6 + C20:3n-6 + C20:4n-6 + C22:4n-6 + C22:5n-6).
